# Supplementary material for: Multiple intrinsic factors act in concert with Lhx2 to direct retinal gliogenesis
Source: PubMed Central journal article supplement (PMC5015061; doi:10.1038/srep32757), 2016-09-08
Supplement: srep32757-s1.pdf [file srep32757-s1.pdf]

**Supplemental Information for the following manuscript:**

**Title:** Multiple intrinsic factors act in concert with Lhx2 to direct retinal gliogenesis

**Authors:** Jimmy de Melo<sup>1</sup>, Brian S. Clark<sup>1</sup>, and Seth Blackshaw<sup>1-5,\*</sup>.

<sup>1</sup>Johns Hopkins University School of Medicine, Solomon H. Snyder Department of Neuroscience, Baltimore, 21205, USA

<sup>2</sup> Johns Hopkins University School of Medicine, Department of Ophthalmology, Baltimore, 21205, USA

<sup>3</sup> Johns Hopkins University School of Medicine, Department of Neurology, Baltimore, 21205, USA

<sup>4</sup> Johns Hopkins University School of Medicine, Center for Human Systems Biology, Baltimore, 21205, USA

<sup>5</sup> Johns Hopkins University School of Medicine, Institute for Cell Engineering, Baltimore, 21205, USA

\*corresponding author (email: sblack@jhmi.edu)

**Supplemental Table 1:** Total cells counted for each gene and genetic background analyzed.

| <b>Gene</b>   | <b>Wildtype</b>  |                           |             | <b><i>Lhx2</i>-deficient</b> |                           |             |
|---------------|------------------|---------------------------|-------------|------------------------------|---------------------------|-------------|
|               | <b>Radial-AC</b> | <b>P27<sup>Kip1</sup></b> | <b>GLUL</b> | <b>Radial-AC</b>             | <b>P27<sup>Kip1</sup></b> | <b>GLUL</b> |
| <i>Cre</i>    | 6064             | 2189                      | 2456        | 4846                         | 2022                      | 1896        |
| <i>NIICD</i>  | 3290             | 1569                      | 1410        | 3187                         | 1530                      | 1293        |
| <i>Nfia</i>   | 4499             | 2190                      | 2258        | 4295                         | 2535                      | 2591        |
| <i>Rax</i>    | 5937             | 2867                      | 2912        | 4244                         | 3222                      | 2885        |
| <i>Plagl1</i> | 6820             | 2879                      | 2893        | 4286                         | 2367                      | 2511        |
| <i>Sox2</i>   | 4766             | 2226                      | 2393        | 5738                         | 2634                      | 2574        |
| <i>Sox8</i>   | 5947             | 2807                      | 2971        | 6923                         | 3672                      | 3465        |
| <i>Sox9</i>   | 5617             | 2949                      | 2642        | 5805                         | 2888                      | 2845        |

The total number of electroporated GFP labeled cells counted for each condition

represents the sum of counts from 6 (P27<sup>Kip1</sup> and GLUL counts) or 12 (Radial and AC counts) independent electroporation replicates. AC=amacrine cell.

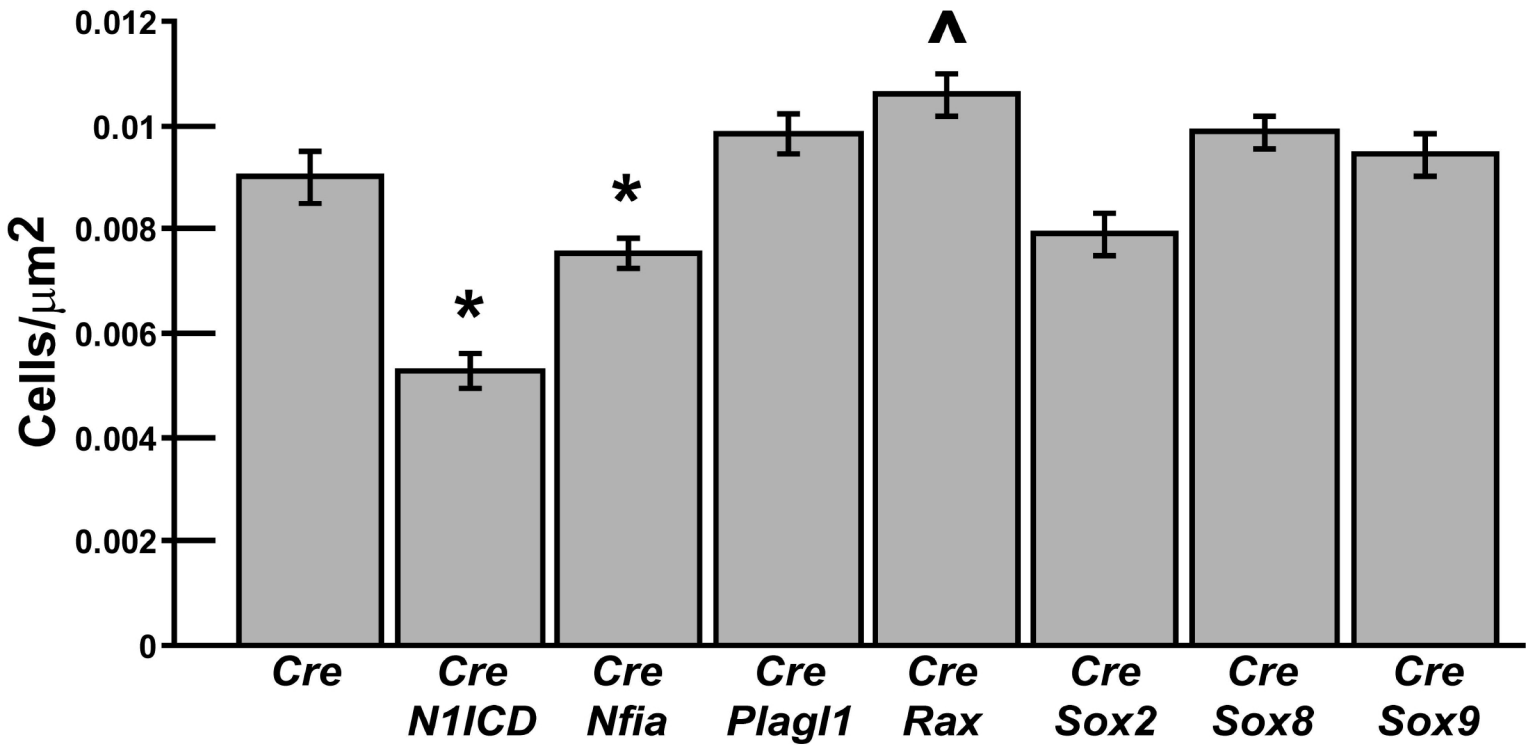

**Supplemental Figure 1. Quantification of density of electroporated cells/ $\mu\text{m}^2$  in *Lhx2*<sup>+/+</sup> mice.** In retinas electroporated with *Cre/GFP*, *Cre/GFP/NIICD*, *Cre/GFP/Nfia*, *Cre/GFP/Plagl1*, *Cre/GFP/Rax*, *Cre/GFP/Sox2*, *Cre/GFP/Sox8*, or *Cre/GFP/Sox9* the cell density of electroporated cells was expressed as the number of GFP labeled cells per  $\mu\text{m}^2$ , where area equals the imaging field taken by the Zeiss Meta 510 LSM confocal microscope at 40X magnification. An asterisk (\*) indicates a significant decrease in density of electroporated cells. A caret (^) indicates a significant increase in the cell density of the electroporated cells.
